# Supplementary material for: Design of Promising Green Cation-Exchange-Membranes-Based Sulfonated PVA and Doped with Nano Sulfated Zirconia for Direct Borohydride Fuel Cells
Source: MDPI journal article supplement (doi:10.3390/polym13234205), 2021-11-30
Supplement: s1 [file s1]

Supplementary information

## **Design of Promising Green Cation Exchange Membranes Based Sulfonated PVA and Doped with Nano Sulfated Zirconia for Direct Borohydride Fuel Cells**

Marwa H. Gouda<sup>1</sup>, Noha A. Elessawy<sup>2</sup>, Sami A. Al-Hussain<sup>3</sup>, Arafat Toghan<sup>3,4\*</sup>

<sup>1</sup>*Polymer Materials Research Department, Advanced Technology and New Materials Research Institute (ATNMRI), City of Scientific Research and Technological Applications City (SRTA-City), 21934 Alexandria, Egypt*

<sup>2</sup>*Computer Based Engineering Applications Department, Informatics Research Institute IRI, City of Scientific Research and Technological Applications City (SRTA-City), 21934 Alexandria, Egypt*

<sup>3</sup>*Chemistry Department, College of Science, Imam Mohammad Ibn Saud Islamic University (IMSIU), Riyadh 11623, Saudi Arabia*

<sup>4</sup>*Chemistry Department, Faculty of Science, South Valley University, Qena 83523, Egypt*

\*Corresponding author E-mail address: (Arafat Toghan): [arafat.toghan@yahoo.com](mailto:arafat.toghan@yahoo.com); [aatahmed@imamu.edu.sa](mailto:aatahmed@imamu.edu.sa)

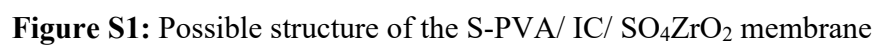

Supplementary information

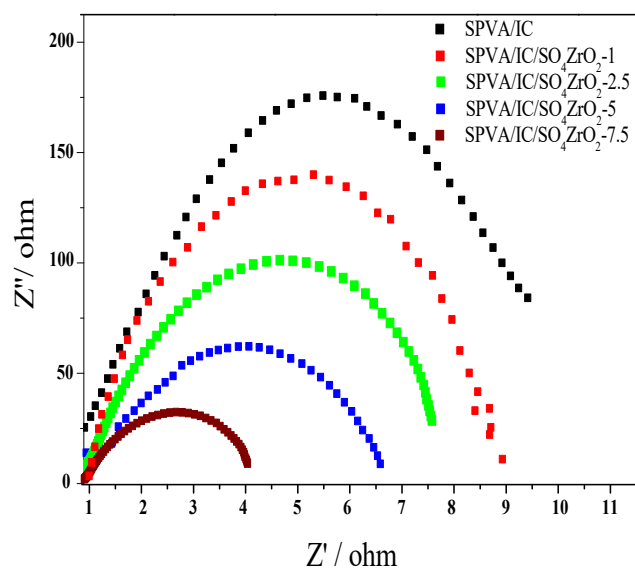

**Figure S2:** Nyquist plot of S-PVA/IC and S-PVA/IC/SO<sub>4</sub>ZrO<sub>2</sub> nanocomposite membranes.

## Supplementary information

**Table S1:** Physicochemical properties of the fabricated membranes and Nafion 117.

| Membrane                                         | Thickness (μm) | WU (%)** | SR (%)** | Contact angle (°)** | Tensile strength (MPa)** | Oxidative stability (RW, %)** |
|--------------------------------------------------|----------------|----------|----------|---------------------|--------------------------|-------------------------------|
| S-PVA/IC                                         | 110            | > 100    | 90±0.3   | 45.36±0.1           | 12.2±0.4                 | 81±0.63                       |
| S-PVA/IC/ SO <sub>4</sub> ZrO <sub>2</sub> -1    | 154            | 95±0.5   | 40±0.2   | 47.53±0.1           | 20.9±0.4                 | 90±0.63                       |
| S-PVA/IC/ SO <sub>4</sub> ZrO <sub>2</sub> - 2.5 | 169            | 40±0.2   | 32±0.1   | 50.86±0.1           | 28.3±0.4                 | 93±0.63                       |
| S-PVA/IC/ SO <sub>4</sub> ZrO <sub>2</sub> - 5   | 173            | 28±0.1   | 20±0.1   | 52.21±0.1           | 34.3±0.4                 | 97±0.63                       |
| S-PVA/IC/ SO <sub>4</sub> ZrO <sub>2</sub> -7.5  | 179            | 22±0.08  | 16±0.1   | 60.60±0.1           | 38.5±0.4                 | 99±0.63                       |
| Nafion 117                                       | 170            | 9.5      | 13       | 102                 | 25                       | 92                            |

\*The retained weight of membranes (RW) after immersion for a day in Fenton's reagent.

\*\*The measurements were replicated three times for the same prepared membranes and the standard deviation was evaluated accordingly for all tests.

## Supplementary information

**Table S2:** Ionic conductivity, Borohydride permeability, IEC and selectivity of the fabricated membranes and Nafion 117.

| Membrane                                  | IEC<br>( $\text{meq g}^{-1}$ )* | Ionic conductivity<br>( $\text{mS cm}^{-1}$ )* | Borohydride permeability<br>( $10^{-6}\text{cm}^2 \text{s}^{-1}$ ) | Selectivity<br>( $10^5 \text{S cm}^{-3} \text{s}$ ) |
|-------------------------------------------|---------------------------------|------------------------------------------------|--------------------------------------------------------------------|-----------------------------------------------------|
| S-PVA/IC                                  | 0.12±0.28                       | 8.1±0.13                                       | 3.8                                                                | 0.021                                               |
| S-PVA/IC/ $\text{SO}_4\text{ZrO}_2$ -1    | 0.13±0.28                       | 10.6±0.13                                      | 0.31                                                               | 0.34                                                |
| S-PVA/IC/ $\text{SO}_4\text{ZrO}_2$ - 2.5 | 0.15±0.28                       | 12.9±0.13                                      | 0.29                                                               | 0.44                                                |
| S-PVA/IC/ $\text{SO}_4\text{ZrO}_2$ - 5   | 0.21±0.28                       | 14.8±0.13                                      | 0.23                                                               | 0.64                                                |
| S-PVA/IC/ $\text{SO}_4\text{ZrO}_2$ -7.5  | 0.24±0.28                       | 21.6±0.13                                      | 0.10                                                               | 2.16                                                |
| Nafion 117                                | 0.89                            | 45.0                                           | 0.40                                                               | 1.12                                                |

\*The measurements were replicated three times for the same prepared membranes and the standard deviation was evaluated accordingly for all tests.
